# Supplementary material for: Nicotinamide Administration Improves Remyelination after Stroke
Source: PubMed Central journal article supplement (PMC5471593; doi:10.1155/2017/7019803), 2017-06-01

*Supplementary figure 1. Sampling regions of O4 detection in immunofluorescence assay was indicated with blue boxes.*

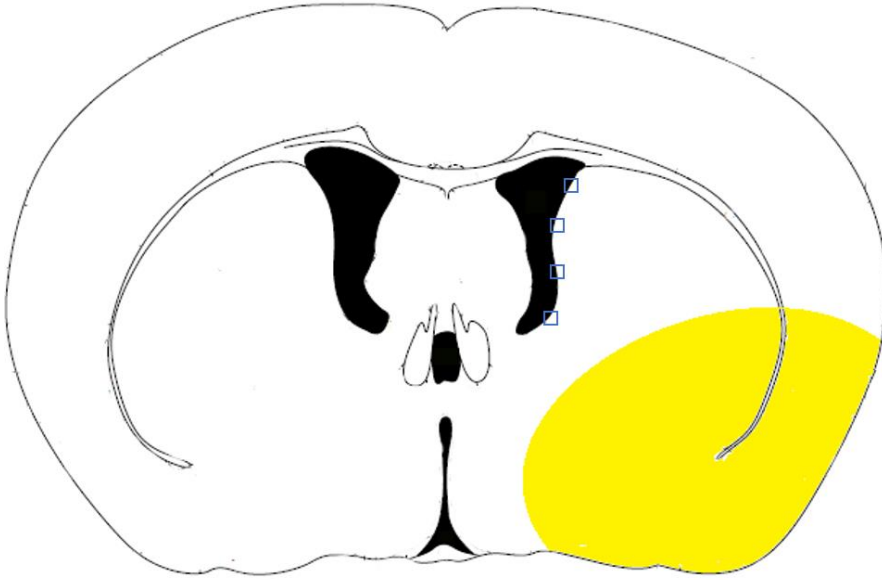

*Supplementary figure 2. Sampling region of MBP detection in immunofluorescence assay was indicated with blue box.*

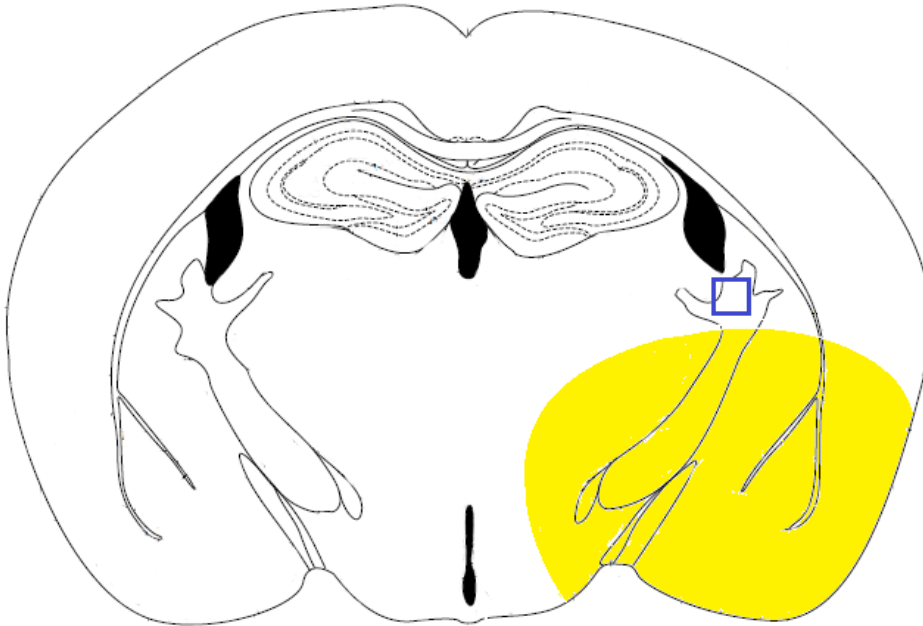

Supplement: 7019803.f1.pdf [file 7019803.f1.pdf]
